# Supplementary material
Source: PubMed Central journal article supplement (PMC4828338)

Supplementary Figures:

Metabolomic analysis of individual metabolites in the class of 1) lipids, 2) fatty acids, 3) carbohydrates, 4) amino acids and 5) others from liver of AdKO mice treated as described for figure 1.

Supplementary Figure 1

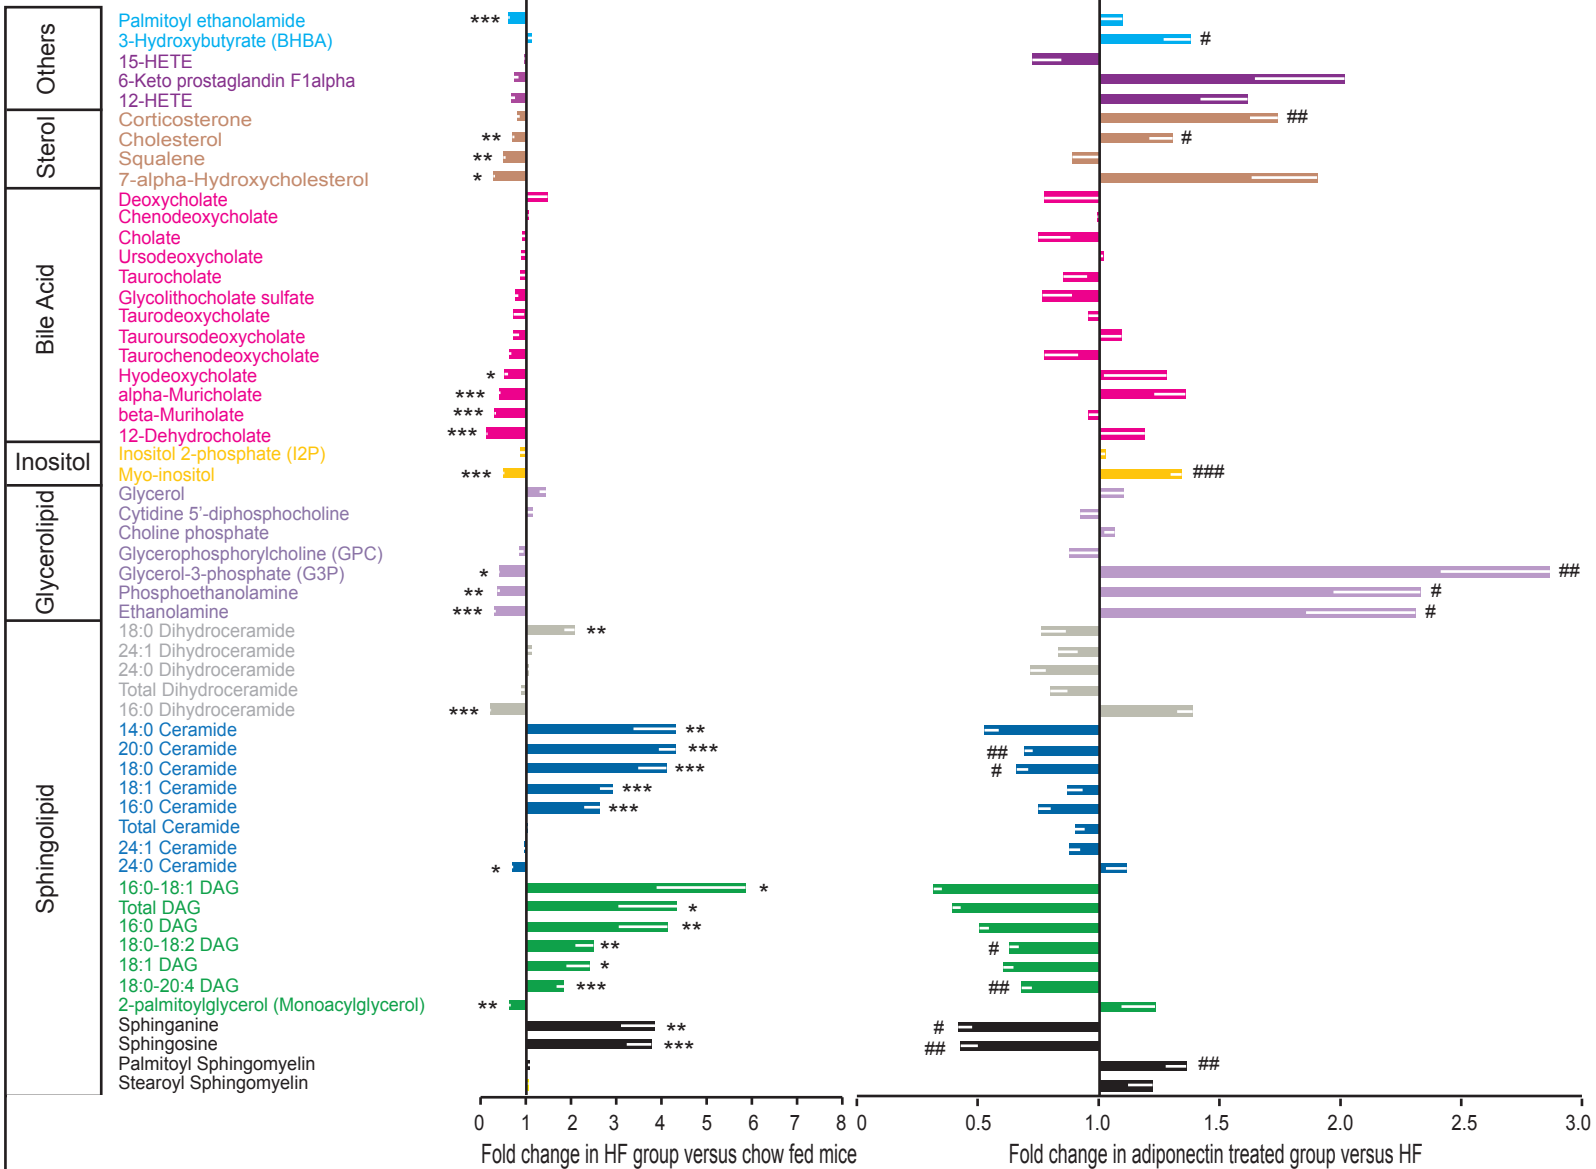

Supplementary Figure 2

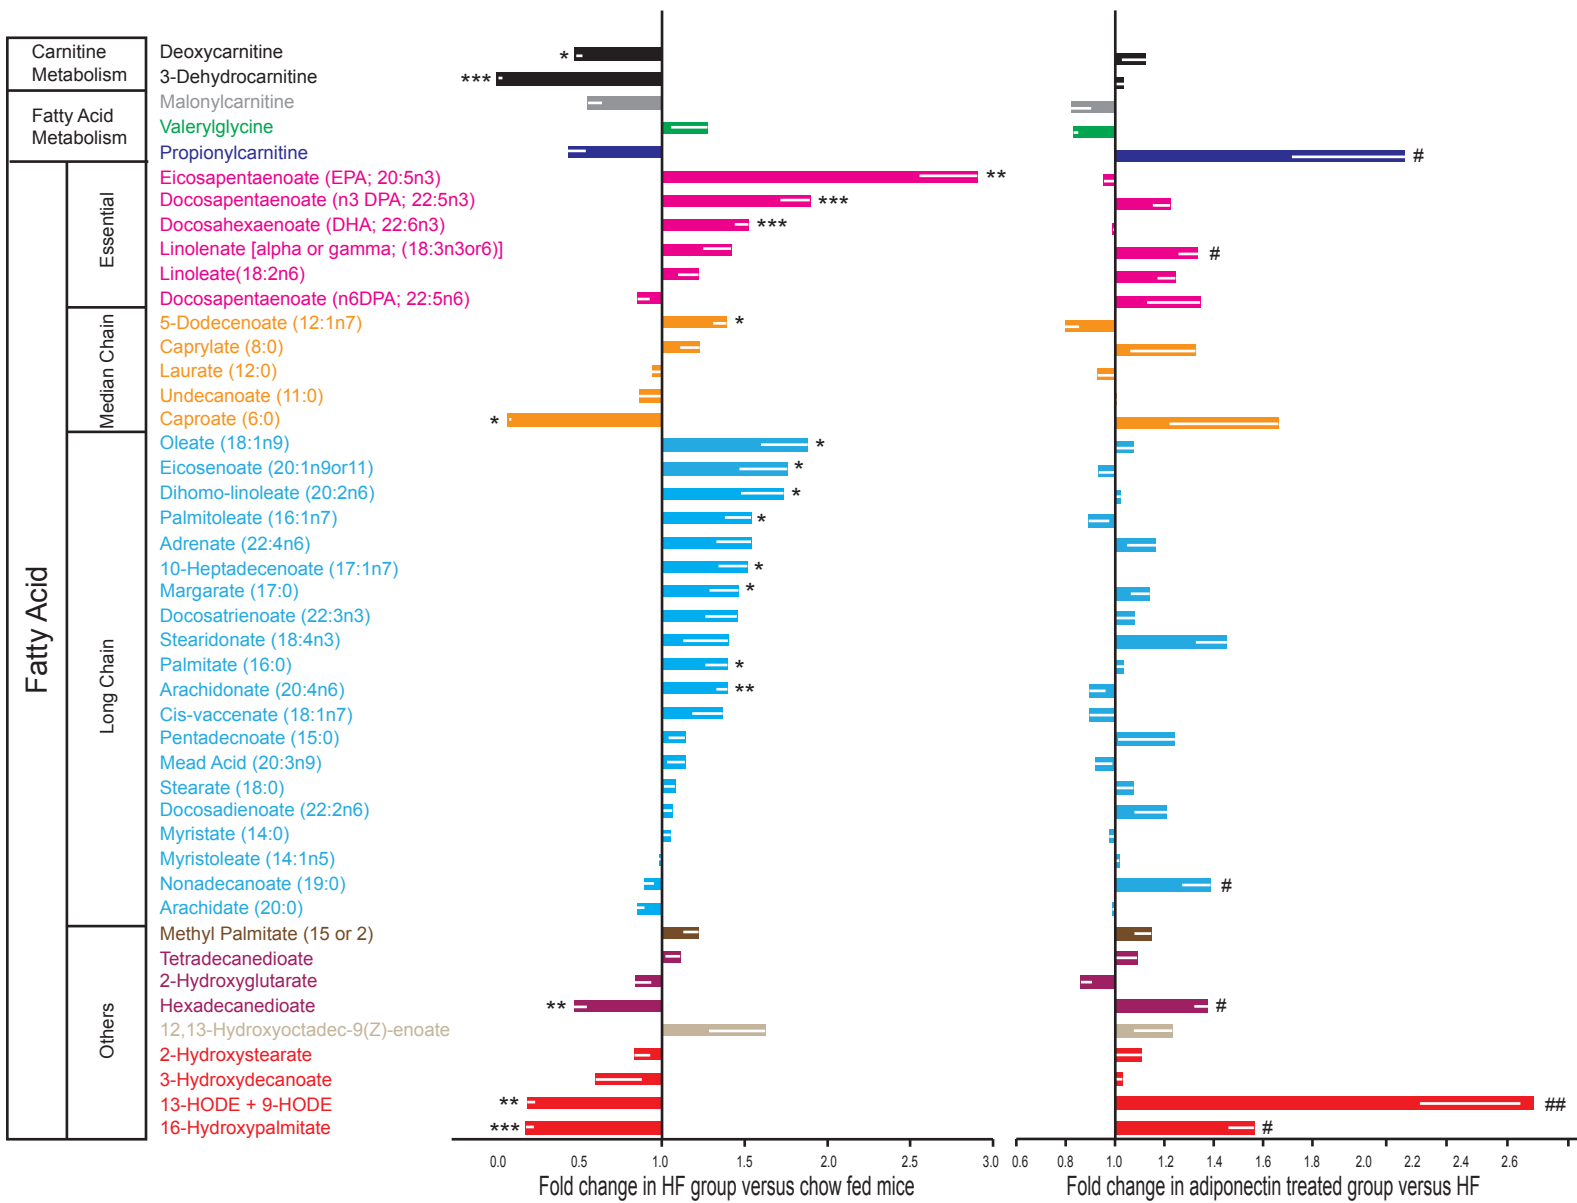

Supplementary Figure 3

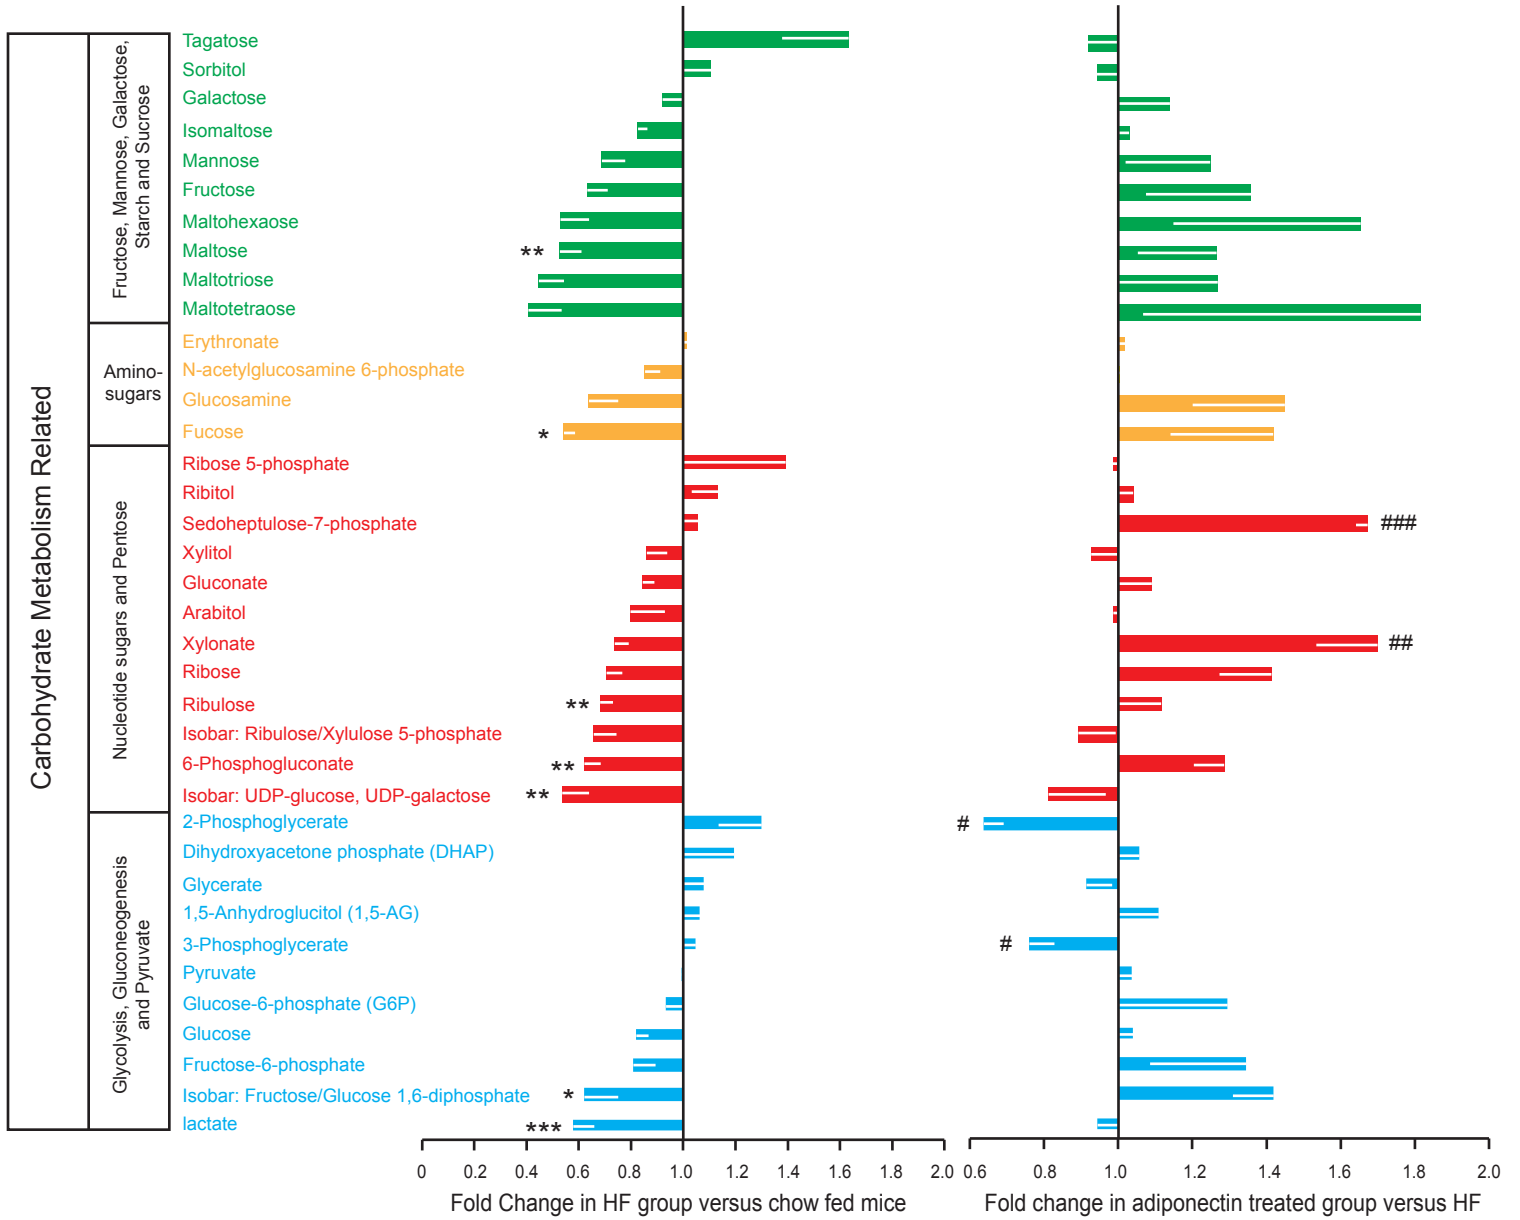

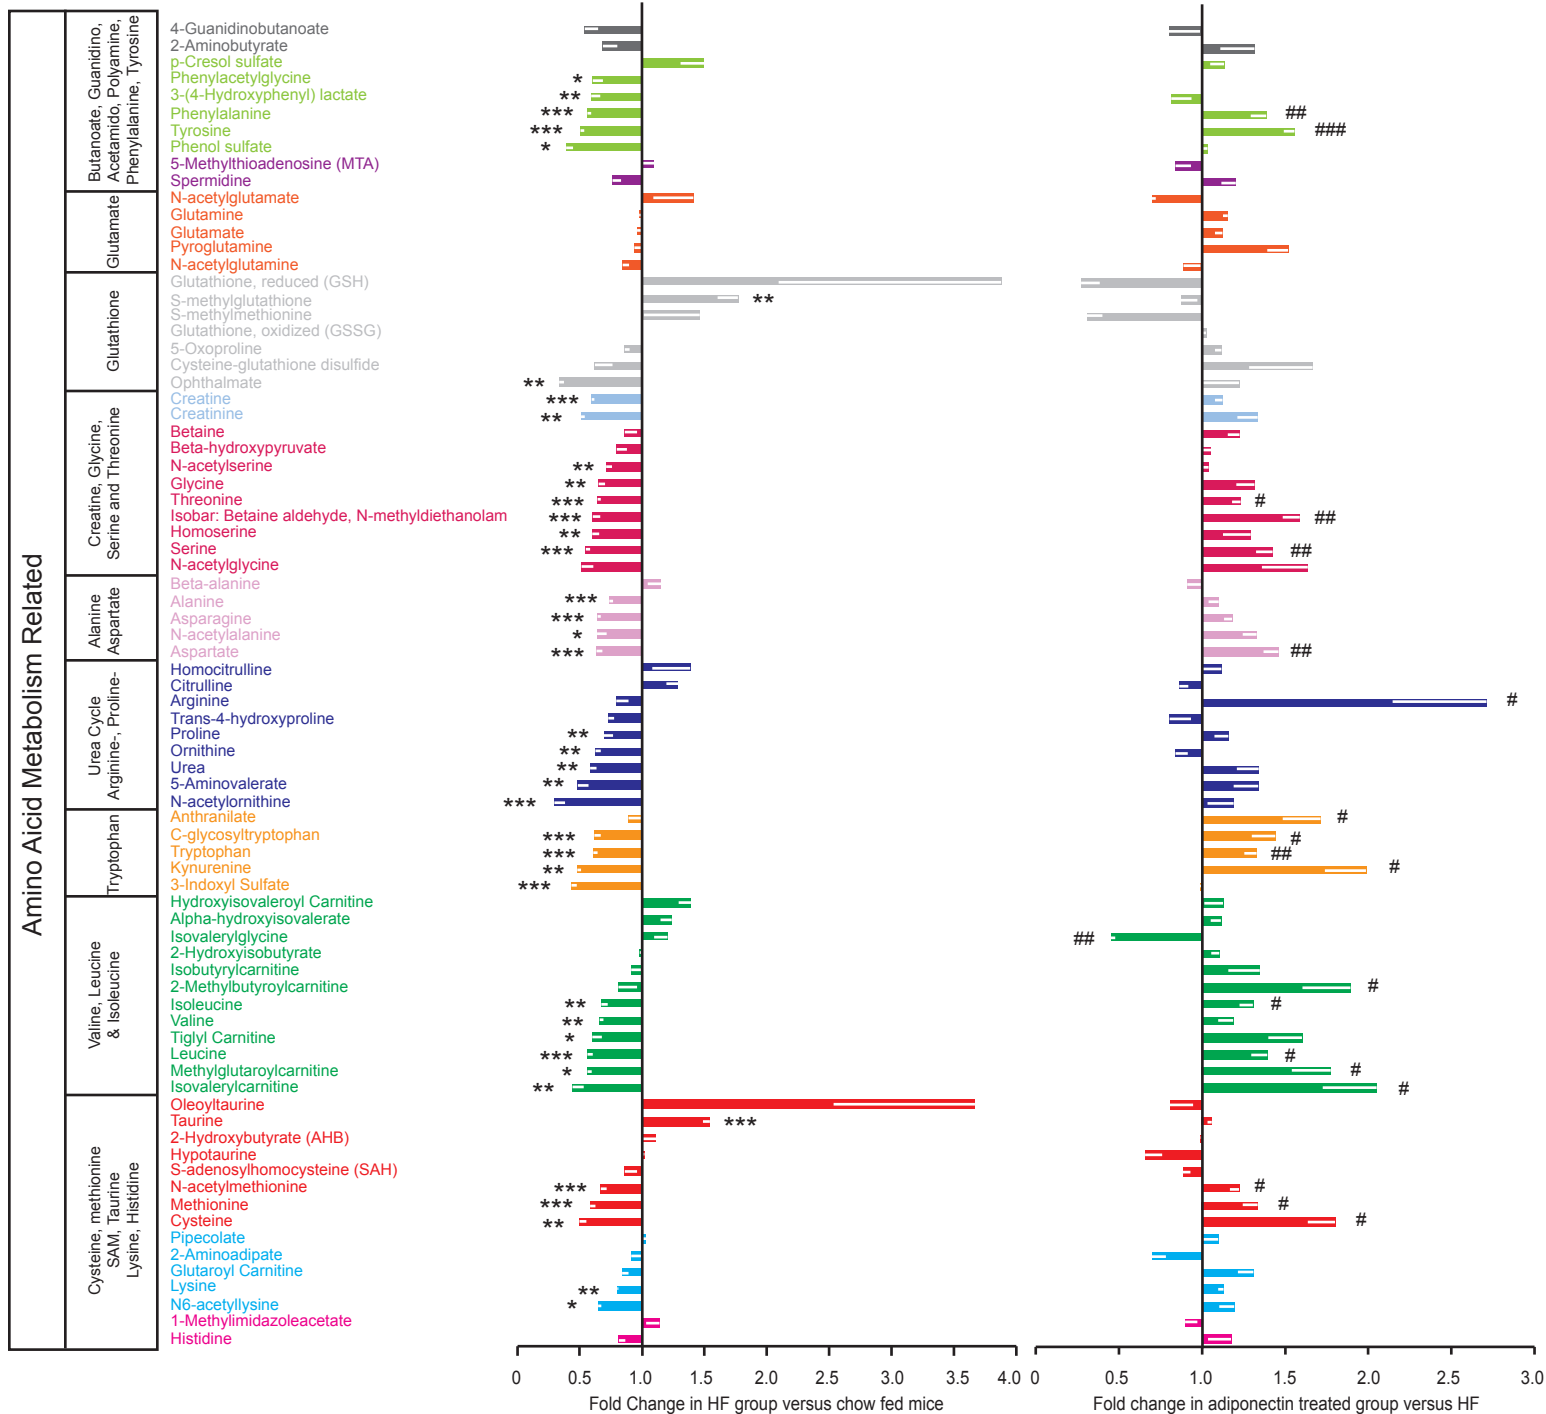

Supplementary Figure 5

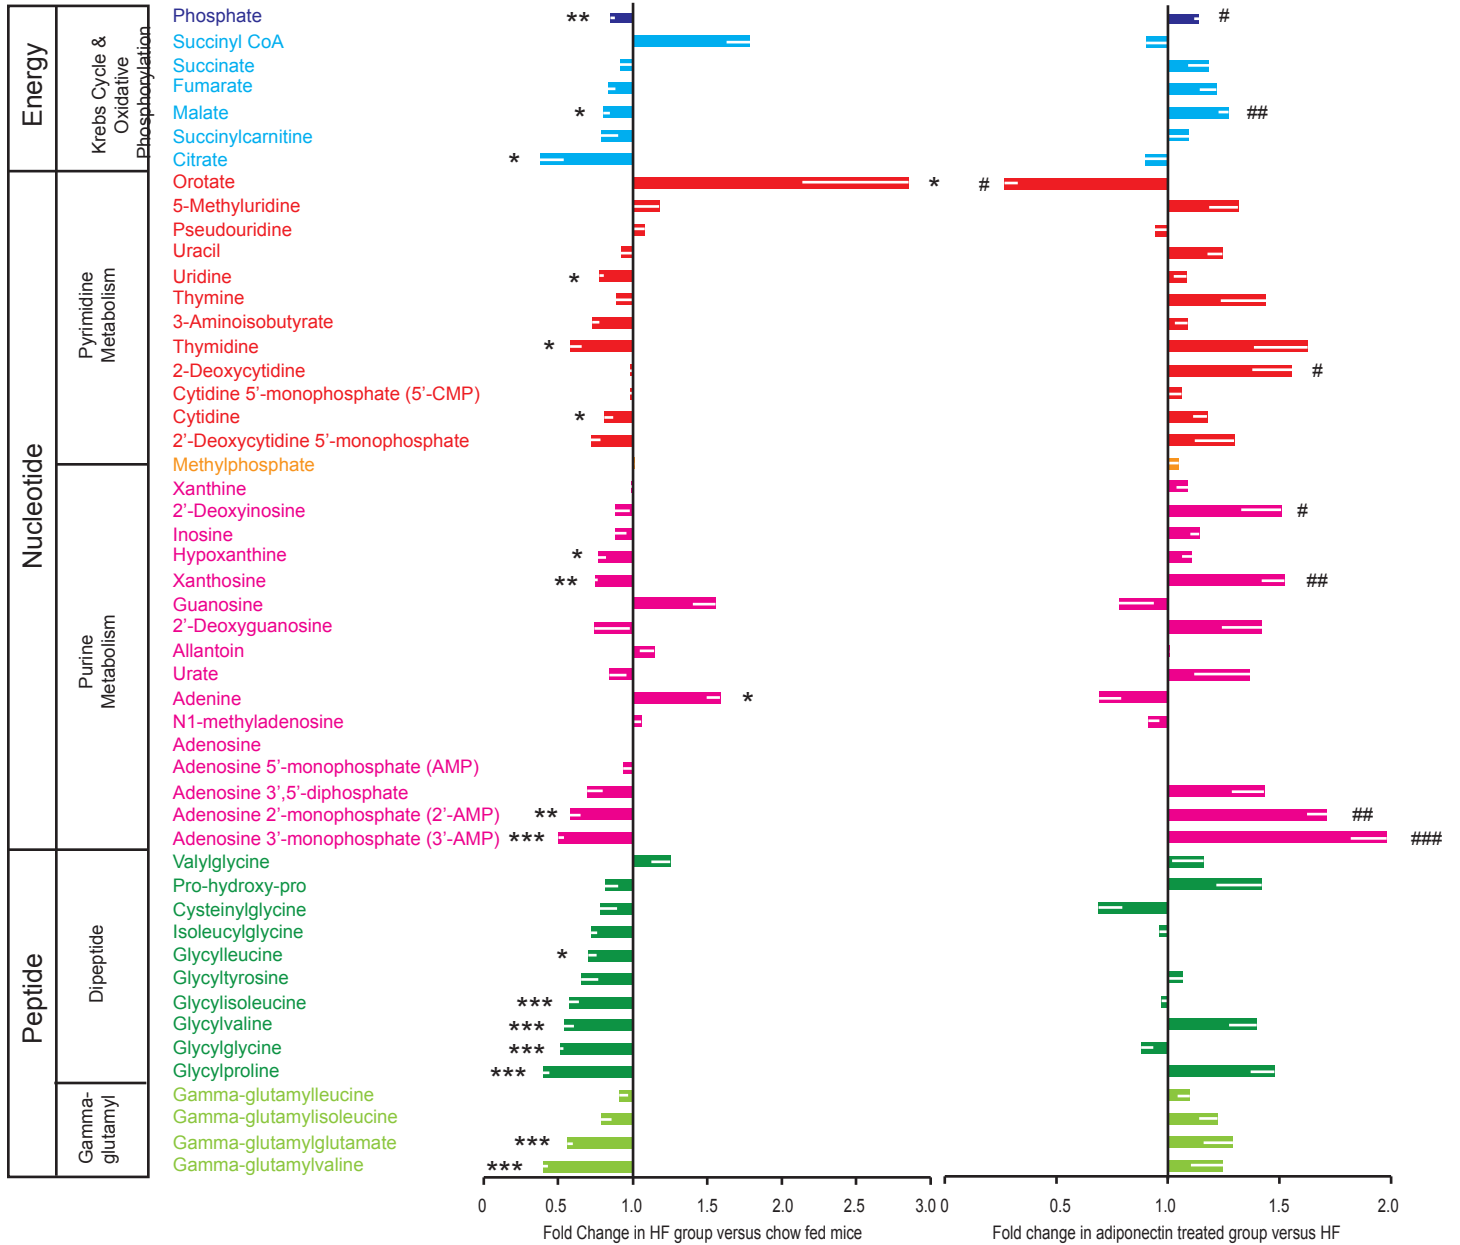

Supplement: NIHMS771272-supplement-supplemental_text_and_figures.pdf [file NIHMS771272-supplement-supplemental_text_and_figures.pdf]
